# Supplementary material for: Accelerated discovery of ferroelectric perovskites with giant polarization via machine learning
Source: Research Square preprint supplement (doi:10.21203/rs.3.rs-5623186/v1), 2025-09-09
Supplement: Supplementary file 1 [file 6ccbc83bdb3f107c26448121.docx]

Accelerated discovery of stable ferroelectric perovskites via machine learning

Wenguang Hu1, Zebin Wu1, Menglu Li1, Shan Feng1, Hangbo Qi1, Xingjian Lu1, Xiaotao Zu1, Liang Qiao1,* and Haiyan Xiao1,*

*1**School of Physics, University of Electronic Science and Technology of China, Chengdu 611731, China*

**Supplementary Figures**


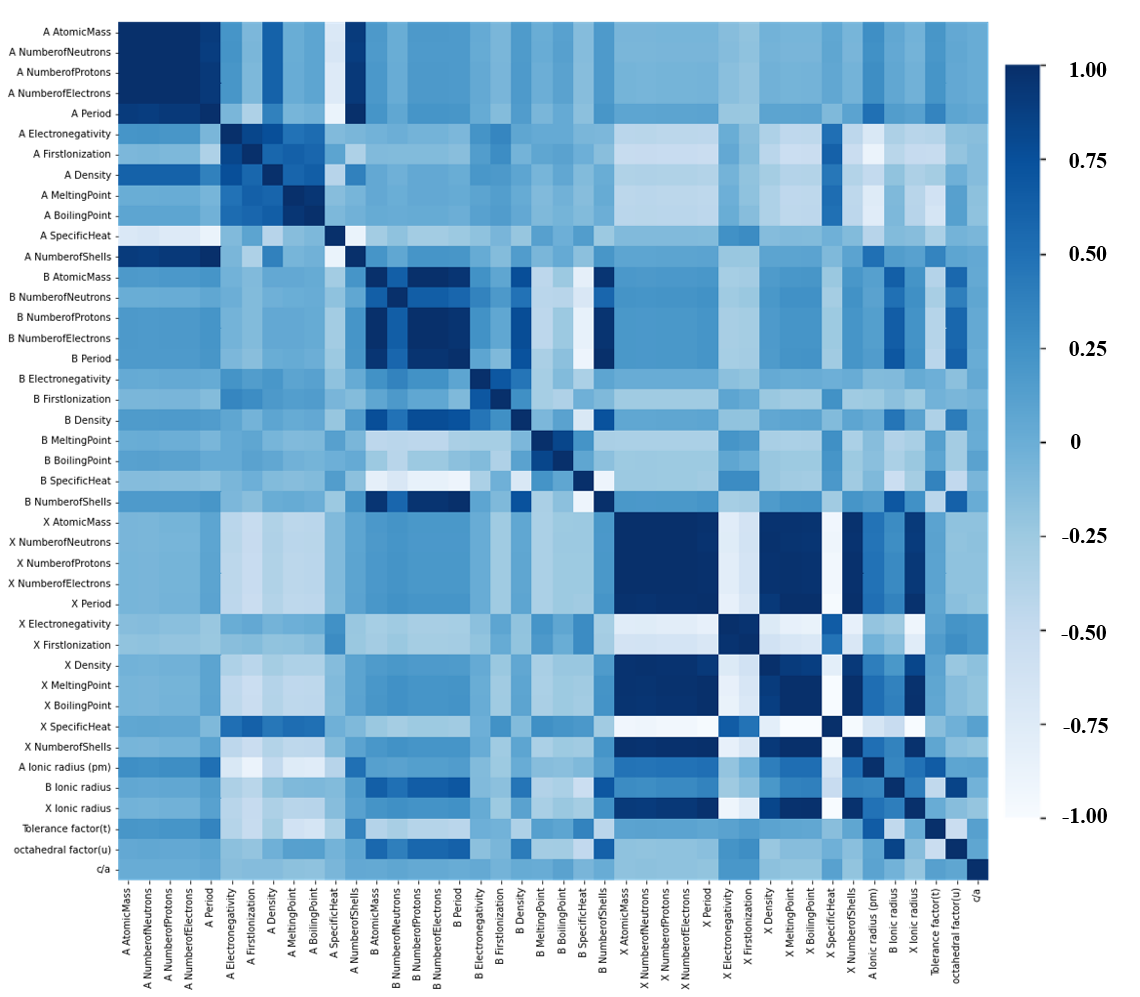


Figure S1. Correlation matrix of Pearson coefficients between 41 features and target c/a.

The Pearson coefficients between 41 original descriptors and the target value c/a are shown in Figure S1. The color indicates the strength of correlation, with darker and lighter colors representing stronger positive and negative correlation, respectively. A correlation coefficient of 0 indicates no correlation. From this, we can select the descriptors which are most correlated with c/a to complete feature engineering.


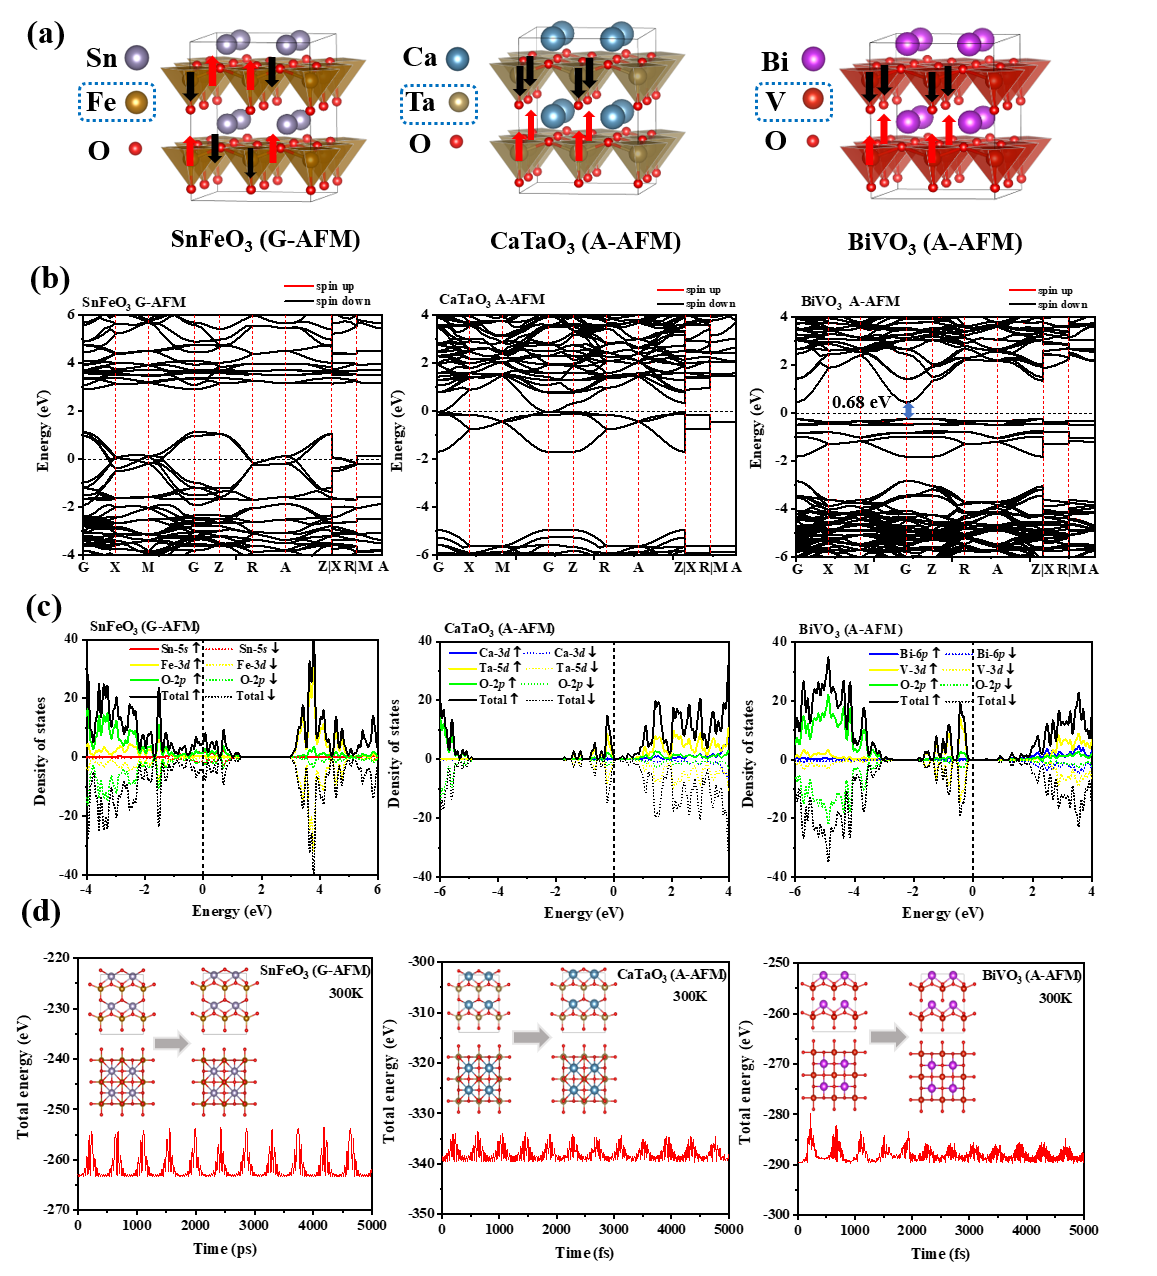


Figure S2. (a) Optimized geometrical structures, in which the magnetic atoms are enclosed in the blue frame, and red and black arrows represent spin up and spin down, respectively; (b) band structures; (c) density of states and (d) variation of total energy with time for SnFeO3 with G-AFM magnetic ordering, CaTaO3 with A-AFM magnetic ordering and BiVO3 with A-AFM magnetic ordering.


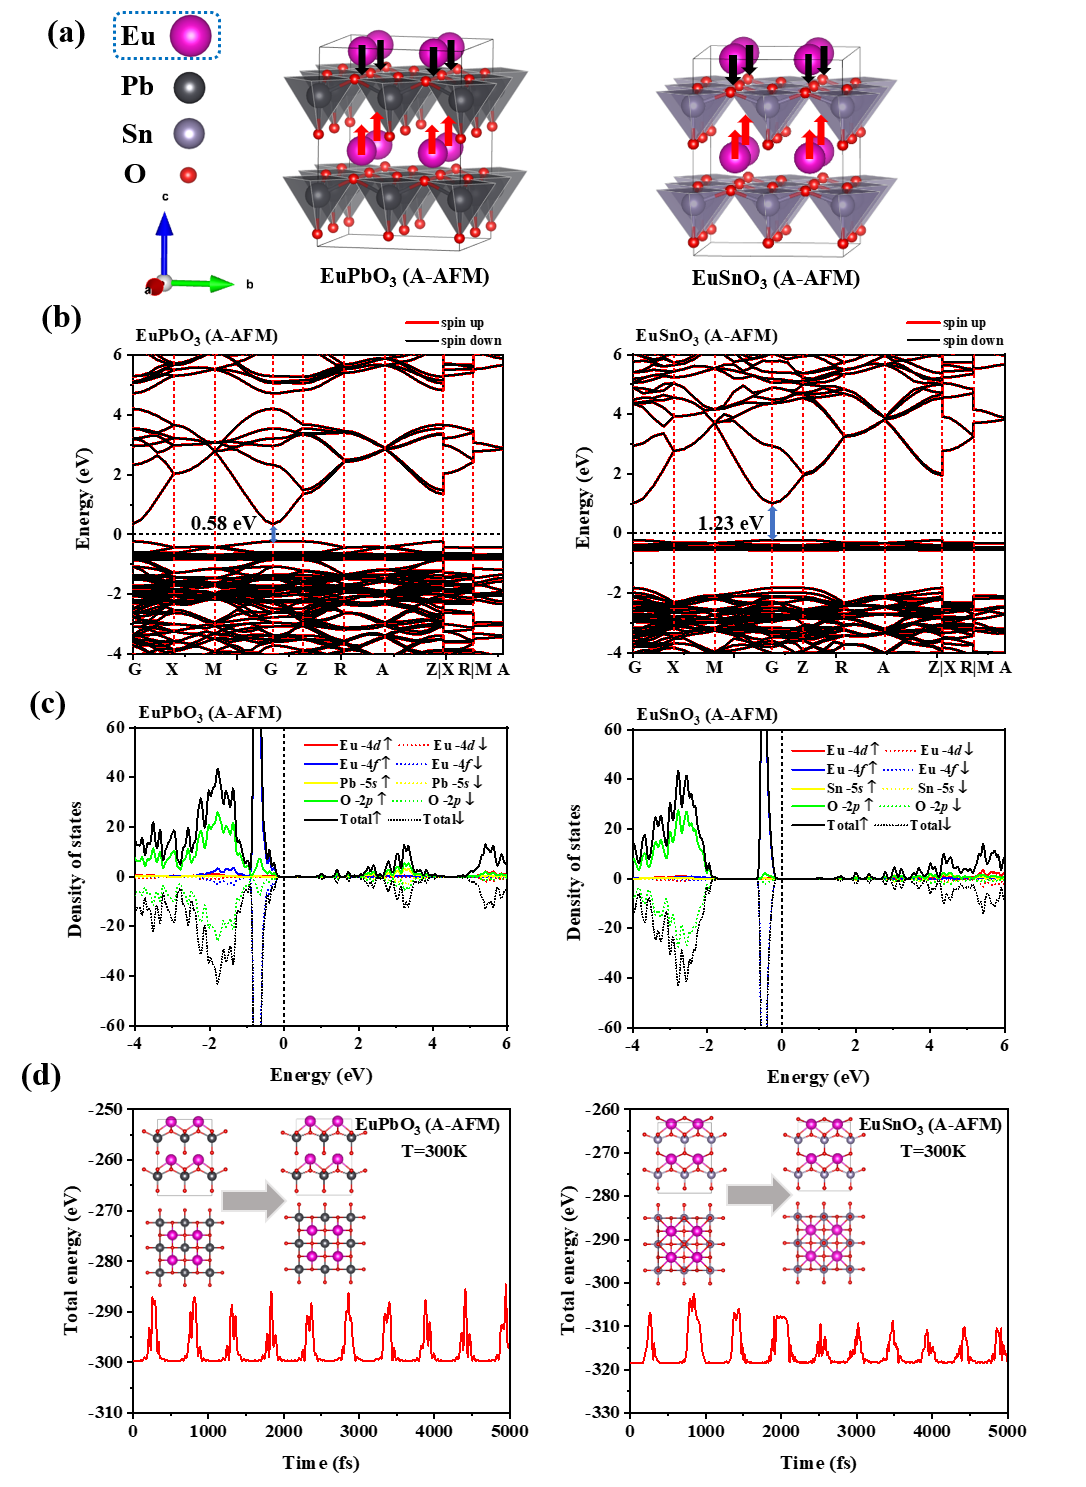


Figure S3. (a) Optimized geometrical structures, in which the magnetic atom is enclosed in the blue frame, and red and black arrows represent spin up and spin down, respectively; (b) band structures, (c) density of states and (d) variation of total energy with time for EuPbO3 and EuSnO3 with A-AFM magnetic orderings.

Figure S2 and Figure S3 illustrate the properties of magnetic perovskites, including SnFeO3 with G-AFM magnetic ordering, CaTaO3 with A-AFM magnetic ordering, BiVO3 with A-AFM magnetic ordering, EuPbO3 with A-AFM magnetic ordering and EuSnO3 with A-AFM magnetic ordering. Although these perovskites may not have the lowest energy configurations, they exhibit excellent ferroelectric properties and environmental stability, making them promising candidates for ferroelectric perovskite materials.


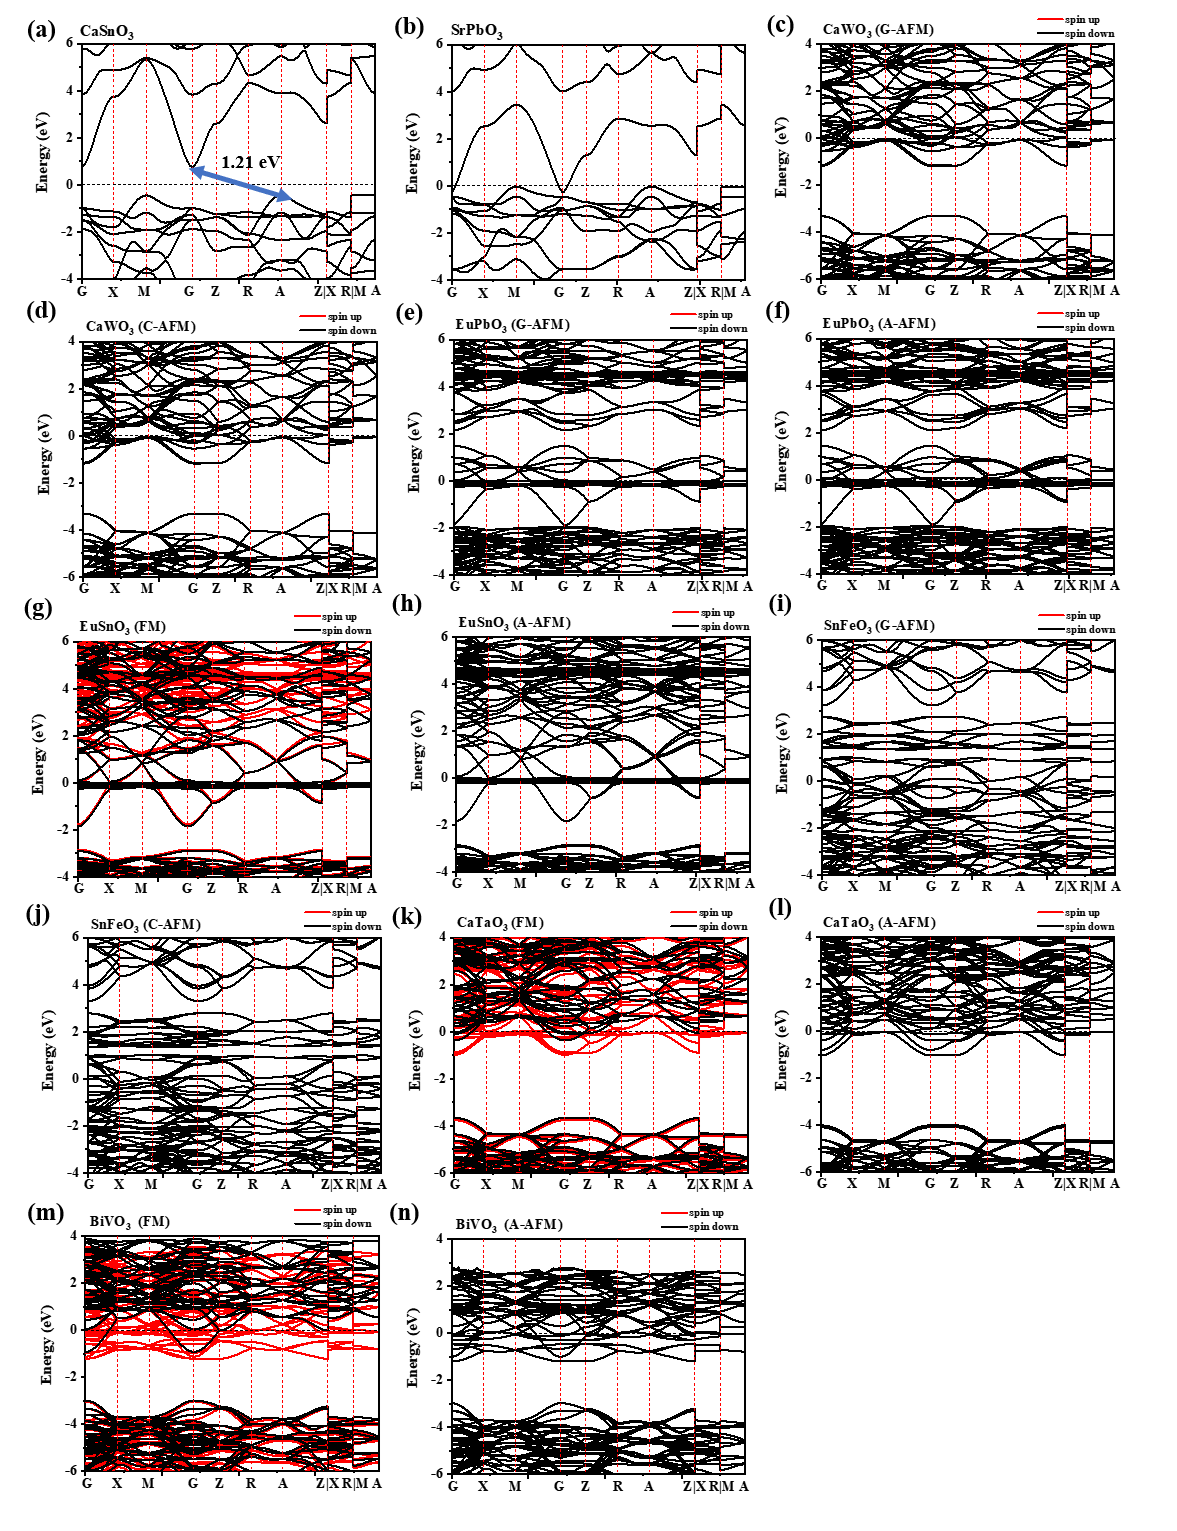


Figure S4. The band structures for selected supertetragonal perovskites obtained by the Perdew-Burke-Ernzerhof (PBE) functional.


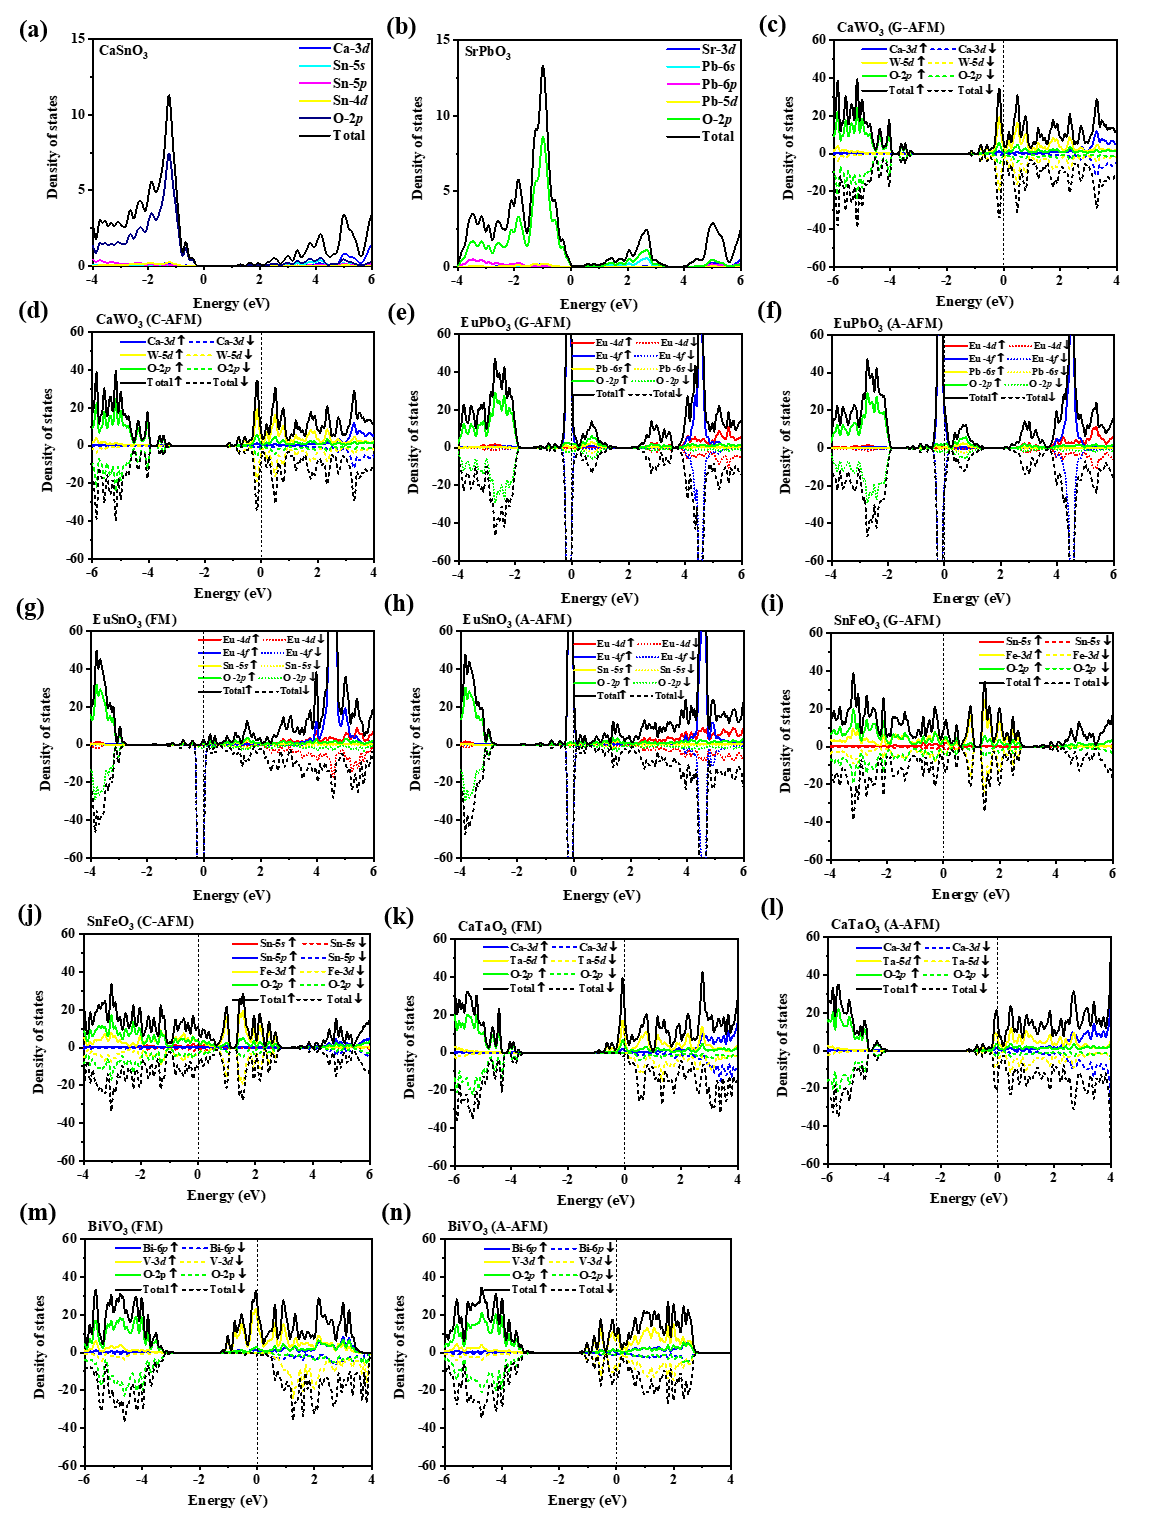


Figure S5. Density of states for selected perovskites obtained by the Perdew-Burke-Ernzerhof (PBE) functional.

Figure S4 and Figure S5 illustrate the band structures and density of states for selected supertetragonal perovskites obtained by PBE functional, respectively. In comparison with the HSE functional results, the PBE functional underestimates the band gap of materials.


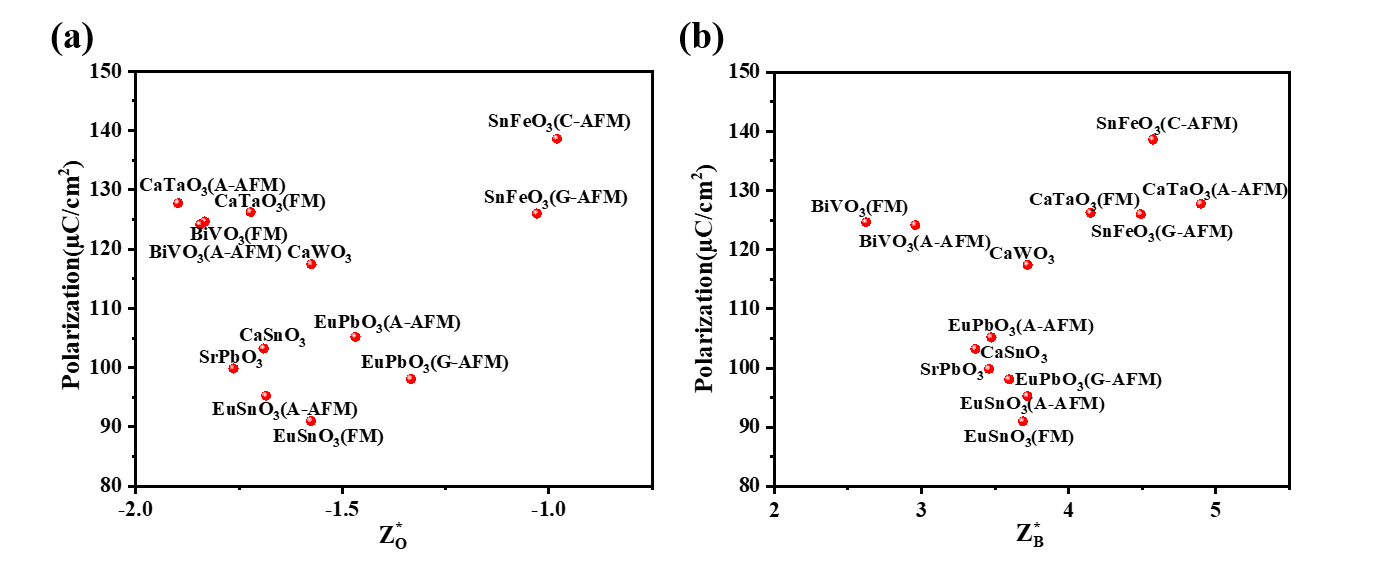


Figure S6. The relationships between polarization and born effective charge of (a) oxygen as well as (b) B-site element in supertetragonal perovskites.

Figure S6 illustrates the relationship between polarization and born effective charge of oxygen as well as B-site element. It seems that the polarization has no liner relationship with the born effective charge of B-site atom Z*B and O atom Z*O.

**Supplementary Tables**

Table S1. Introduction of the physical significance for descriptors.

| Descriptor | Full name | Introduction |
| --- | --- | --- |
| μ | Octahedral factor | 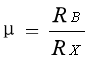  RB ,ion radius of B;RX ,ion radius of X |
| t | Tolerance factor | 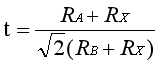  RA ,ion radius of A;RB ,ion radius of B;RX ,ion radius of X |
| RIA | A Ionic radius | Ion radius of A-site element |
| RIB | B Ionic radius | Ion radius of B-site element |
| RIX | X Ionic radius | Ion radius of X-site element |
| MA | A AtomicMass | Atomic mass of A-site element |
| MB | B AtomicMass | Atomic mass of B-site element |
| MX | X AtomicMass | Atomic mass of X-site element |
| NNA | A NumberofNeutrons | Number of neutrons of A-site element |
| NNB | B NumberofNeutrons | Number of neutrons of B-site element |
| NNX | X NumberofNeutrons | Number of neutrons of X-site element |
| NPA | A NumberofProtons | Number of protons of A-site element |
| NPB | B NumberofProtons | Number of protons of B-site element |
| NPX | X NumberofProtons | Number of protons of X-site element |
| NEA | A NumberofElectrons | Number of electrons of A-site element |
| NEB | B NumberofElectrons | Number of electrons of B-site element |
| NEX | X NumberofElectrons | Number of electrons of X-site element |
| PA | A Period | The period in which element A is located |
| PB | B Period | The period in which element B is located |
| PX | X Period | The period in which element X is located |
| EA | A Electronegativity | Electronegativity of A atom |
| EB | B Electronegativity | Electronegativity of B atom |
| EX | X Electronegativity | Electronegativity of X atom |
| FA | A FirstIonization | First ionization of A atom |
| FB | B FirstIonization | First ionization of B atom |
| FX | X FirstIonization | First ionization of X atom |
| DA | A Density | A density of single substance |
| DB | B Density | B density of single substance |
| DX | X Density | X density of single substance |
| MPA | A MeltingPoint | A Melting point of single substance |
| MPB | B MeltingPoint | B Melting point of single substance |
| MPX | X MeltingPoint | X Melting point of single substance |
| BPA | B BoilingPoint | A Boiling point of single substance |
| BPB | B BoilingPoint | B Boiling point of single substance |
| BPX | B BoilingPoint | X Boiling point of single substance |
| HA | A SpecificHeat | A specific heat of single substance |
| HB | B SpecificHeat | B specific heat of single substance |
| HX | X SpecificHeat | X specific heat of single substance |
| SA | A NumberofShells | Number of shells of A-site element |
| SB | B NumberofShells | Number of shells of B-site element |
| SX | X NumberofShells | Number of shells of X-site element |

Table S2.Training scores and test scores with different classifiers.

| **classifier** | **train score** | | | **test score** | | |
| --- | --- | --- | --- | --- | --- | --- |
| **accuracy** | **precision** | **recall** | **accuracy** | **precision** | **recall** |
| Random Forest | 0.924 | 1 | 0.643 | 0.897 | 1 | 0.4 |
| Extra Trees | 1 | 1 | 1 | 1 | 1 | 1 |

Table S3. Energy, magnetic moment, lattice constants of selected magnetic supertetragonal perovskites with different magnetic ordering. MM: magnetic moment of Eu, V, Fe, Ta, Tb, and W.

| Formula | Magnetic ordering | MM (µB) | Energy (eV) | E-EFM (eV) | a (Å) | c (Å) | c/a |
| --- | --- | --- | --- | --- | --- | --- | --- |
| EuPbO3 | FM | 6.555 | -37.3363 | 0.0000 | 3.9894 | 5.4898 | 1.3761 |
| G-AFM | 6.557 | -37.3443 | -0.0081 | 3.9860 | 5.4842 | 1.3759 |
| A-AFM | 6.556 | -37.3370 | -0.0007 | 3.9876 | 5.4898 | 1.3767 |
| C-AFM | 6.555 | -37.3194 | 0.0169 | 3.9879 | 5.4927 | 1.3773 |
| EuSnO3 | FM | 6.701 | -39.6122 | 0.0000 | 3.9109 | 5.1203 | 1.3092 |
| G-AFM | 6.699 | -39.6034 | 0.0088 | 3.9097 | 5.1192 | 1.3094 |
| A-AFM | 6.702 | -39.6118 | 0.0004 | 3.9098 | 5.1207 | 1.3097 |
| C-AFM | 6.698 | -39.6024 | 0.0098 | 3.9102 | 5.1200 | 1.3094 |
| BiVO3 | FM | 1.683 | -36.0392 | 0.0000 | 3.7870 | 4.7482 | 1.2538 |
| G-AFM | 1.414 | -35.9685 | 0.0707 | 4.0137 | 3.8890 | 0.9689 |
| A-AFM | 1.662 | -36.0366 | 0.0026 | 3.7767 | 4.7597 | 1.2603 |
| C-AFM | 1.459 | -35.8756 | 0.1636 | 3.8307 | 4.6171 | 1.2053 |
| SnFeO3 | FM | 3.277 | -32.5087 | 0.0000 | 3.6929 | 4.7804 | 1.2945 |
| G-AFM | 3.468 | -32.6674 | -0.1587 | 3.6563 | 4.8352 | 1.3224 |
| A-AFM | 3.257 | -32.5226 | -0.0138 | 3.7154 | 4.7442 | 1.2769 |
| C-AFM | 3.403 | -32.6760 | -0.1673 | 3.6598 | 4.8233 | 1.3179 |
| SrFeO3 | FM | 2.872 | -34.6519 | 0.0000 | 3.8635 | 3.8249 | 0.9900 |
| G-AFM | 2.695 | -34.3243 | 0.3276 | 3.7394 | 4.2942 | 1.1484 |
| A-AFM | 2.892 | -34.6178 | 0.0341 | 3.8687 | 3.8274 | 0.9893 |
| C-AFM | 2.908 | -34.5038 | 0.1481 | 3.8473 | 3.8974 | 1.0130 |
| CaTaO3 | FM | 0.458 | -41.7957 | 0.0000 | 3.7403 | 5.0222 | 1.3427 |
| G-AFM | 0 | -42.5049 | -0.7092 | 4.0297 | 4.0558 | 1.0065 |
| A-AFM | 0.371 | -41.7900 | 0.0057 | 3.7900 | 4.9078 | 1.2949 |
| C-AFM | 0 | -42.5047 | -0.7090 | 4.0302 | 4.0544 | 1.0060 |
| SrTbO3 | FM | 0.037 | -34.2697 | 0.0000 | 4.3609 | 4.5845 | 1.0513 |
| G-AFM | 0.01 | -34.2078 | 0.0619 | 4.3679 | 4.5711 | 1.0465 |
| A-AFM | 0.023 | -34.2046 | 0.0651 | 4.3695 | 4.5756 | 1.0472 |
| C-AFM | 0 | -34.2020 | 0.0677 | 4.3682 | 4.5598 | 1.0439 |
| CaTbO3 | FM | 0.023 | -34.3544 | 0.0000 | 4.2960 | 4.6593 | 1.0846 |
| G-AFM | 0.009 | -34.2862 | 0.0682 | 4.3100 | 4.6711 | 1.0838 |
| A-AFM | 0.008 | -34.2826 | 0.0718 | 4.3087 | 4.6609 | 1.0818 |
| C-AFM | 0 | -34.2645 | 0.0898 | 4.3082 | 4.6167 | 1.0716 |
| CaWO3 | FM | 0 | -41.1054 | 0.0000 | 4.0020 | 3.9565 | 0.9886 |
| G-AFM | 0 | -39.8845 | 1.2209 | 3.6737 | 4.9779 | 1.3550 |
| A-AFM | 0 | -41.1054 | 0.0000 | 4.0033 | 3.9549 | 0.9879 |
| C-AFM | 0 | -39.8845 | 1.2209 | 3.6742 | 4.9764 | 1.3544 |

The ground state properties of selected magnetic perovskites with different magnetic orderings are studied, and the results are summarized in Table S2. It is shown that CaWO3 exhibits no magnetic moment under different magnetic orderings. Therefore, we conclude that CaWO3 is non-magnetic perovskite.

Table S4.The displacement between the center B-site atom and the surrounding O atoms (ΔB-O), the born effective charge of A-site, B-site and O atoms (Z*A, Z*B, and Z*O), and the volume of the unit cell for eight screened supertetragonal perovskites.

| **Formula** | **Magnetic ordering** | **𝛥B-O (Å)** | **Z*A** | **Z*B** | **Z*O** | **Z*O1** | **V (Å3)** |
| --- | --- | --- | --- | --- | --- | --- | --- |
| CaSnO3 | --- | 0.744 | 2.423 | 3.366 | -1.690 | -2.408 | 74.202 |
| SrPbO3 | --- | 0.849 | 2.671 | 3.458 | -1.763 | -2.603 | 86.589 |
| CaWO3 | --- | 0.757 | 2.881 | 3.721 | -1.575 | -3.452 | 67.217 |
| EuPbO3 | G-AFM | 0.966 | 2.142 | 3.596 | -1.333 | -3.072 | 87.131 |
| A-AFM | 0.971 | 2.485 | 3.474 | -1.468 | -3.022 | 87.314 |
| EuSnO3 | FM | 0.718 | 2.191 | 3.689 | -1.575 | -2.729 | 78.315 |
| A-AFM | 0.717 | 2.375 | 3.719 | -1.684 | -2.725 | 78.275 |
| SnFeO3 | G-AFM | 0.709 | 2.222 | 4.489 | -1.029 | -4.653 | 64.626 |
| C-AFM | 0.700 | 2.721 | 4.573 | -0.980 | -5.333 | 64.607 |
| CaTaO3 | FM | 0.767 | 2.726 | 4.149 | -1.722 | -3.432 | 70.246 |
| A-AFM | 0.710 | 2.601 | 4.898 | -1.897 | -3.705 | 70.499 |
| BiVO3 | FM | 0.674 | 3.795 | 2.624 | -1.833 | -2.754 | 68.093 |
| A-AFM | 0.682 | 3.540 | 2.958 | -1.844 | -2.810 | 67.905 |
